# Supplementary material for: Fishery catch records support machine learning-based prediction of illegal fishing off US West Coast
Source: PeerJ journal article supplement (doi:10.7717/peerj.16215), 2023-10-19

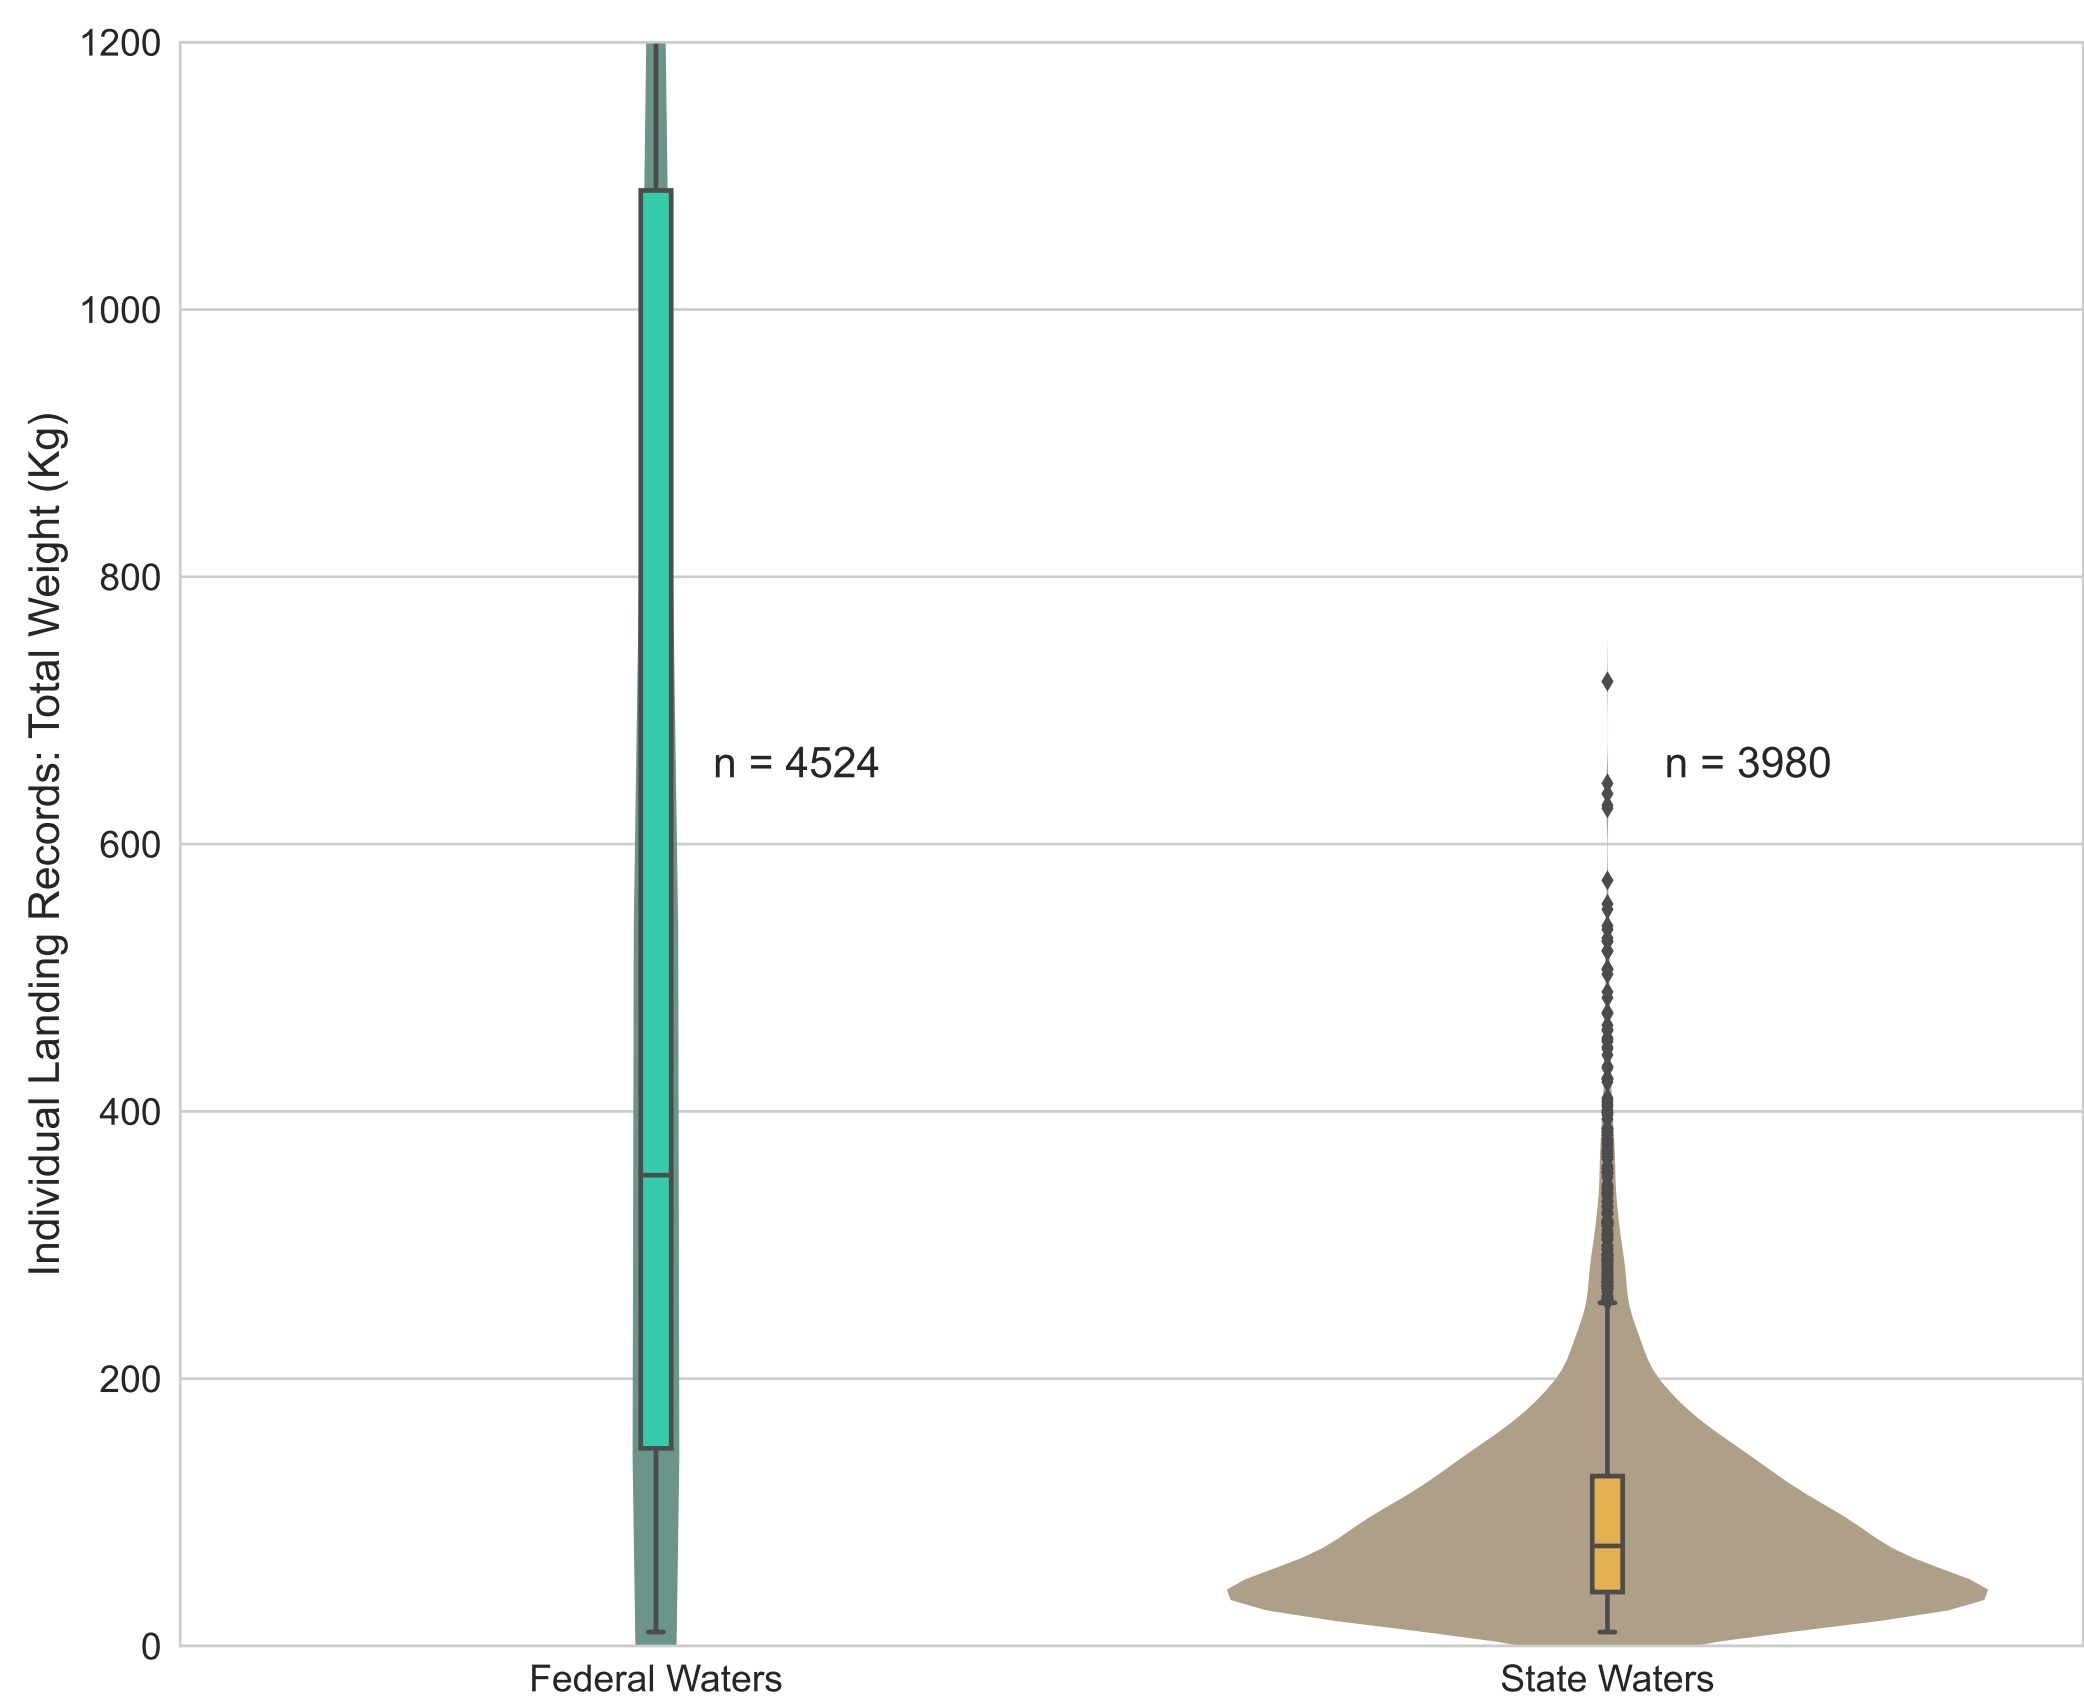

Supplement: FigureS1.pdf [file FigureS1.pdf]
