# Supplementary material for: Fishery catch records support machine learning-based prediction of illegal fishing off US West Coast
Source: PeerJ journal article supplement (doi:10.7717/peerj.16215), 2023-10-19

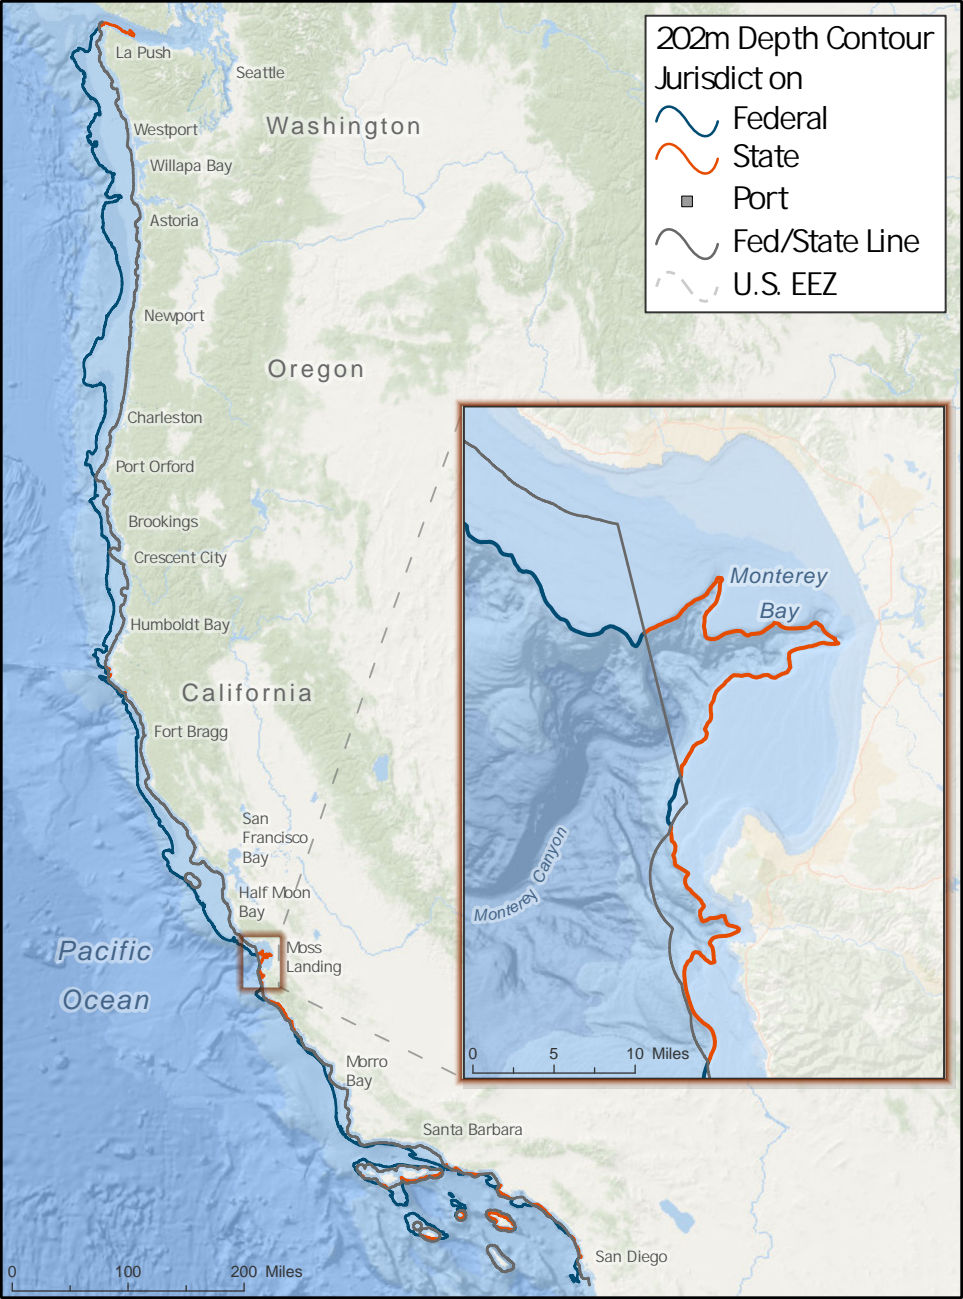

### 202m Depth Contour Jurisdict on

-  Federal
-  State
-  Port
-  Fed/State Line
-  U.S. EEZ

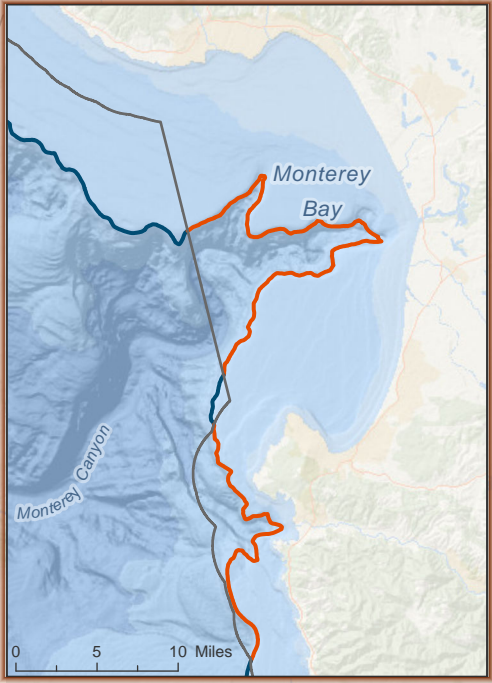

Supplement: FigureS2.pdf [file FigureS2.pdf]
