# Supplementary material for: Fishery catch records support machine learning-based prediction of illegal fishing off US West Coast
Source: PeerJ journal article supplement (doi:10.7717/peerj.16215), 2023-10-19
Supplement: FigureS6.pdf [file FigureS6.pdf]

**Enforcement Data Management** | CKOHLER | Commercial | Help

## Predictive Analytics Violations

This report identifies commercial groundfish fixed gear vessels that may have fished in federal waters without an active vessel monitoring system on the landing day or the previous day. These potential violations are listed below in the summary vessel report with an option to drill down to the individual landings. Additional information is available in this [user guide](#)

Search: [ ] Go [ ] Actions [ ]

| Vessel Num | Min Violation Date | Max Violation Date | Assignee | Status Name | Washington | Oregon | California | Total Potential Violations | Pacfin Model Rundate | Updated Mark | Moduser |
|------------|--------------------|--------------------|----------|-------------|------------|--------|------------|----------------------------|----------------------|--------------|---------|
| [ ]        | 4/4/2018           | 10/11/2021         | -        | -           | 0          | 0      | 6          | 6                          | 10/22/2021           | 2            | ENF     |
| [ ]        | 4/1/2021           | 9/27/2021          | -        | -           | 0          | 0      | 3          | 3                          | 10/22/2021           | 2            | ENF     |
| [ ]        | 12/10/2017         | 9/21/2021          | -        | -           | 0          | 0      | 5          | 5                          | 10/22/2021           | 2            | ENF     |

**Summary of All Potential Violations by Vessels**

**Detailed Records of Individual Vessel's Potential Violations**

**Enforcement Data Management** | CKOHLER | Commercial | Help

Predictive Analytics Violations > Predictive Analytics Violation

Show All Details Notes

Search: [ ] Go [ ] Actions [ ]

| Vessel Number | Ticket Source Code | Agency Code | Year | Landing Date | Port Name | CDFW Area Block | Pacfin Gear Description | Pacfin Species Name  | Is Predicted Waters Rfc | Probability Federal Waters Rfc | Probability Federal Waters Gbc | Is Predicted Waters Gbc | Abs Model Prob Difference | Probs Similarity | Is Over Port Threshold | Pacfin Model Rundate |
|---------------|--------------------|-------------|------|--------------|-----------|-----------------|-------------------------|----------------------|-------------------------|--------------------------------|--------------------------------|-------------------------|---------------------------|------------------|------------------------|----------------------|
| E             | C                  | C           | 2021 | 10/11/2021   | EUREKA    | 120             | POLE (COMMERCIAL)       | SABLEFISH            | FEDERAL                 | .9968203117                    | .9953533024                    | FEDERAL                 | 0                         | HIGH AGREEMENT   | T                      | 10/22/2021           |
| E             | C                  | C           | 2021 | 9/27/2021    | EUREKA    | 1041            | LONGLINE OR SETLINE     | SABLEFISH            | FEDERAL                 | .988736592                     | .9947637743                    | FEDERAL                 | .01                       | HIGH AGREEMENT   | T                      | 10/22/2021           |
| E             | C                  | C           | 2021 | 9/18/2021    | EUREKA    | 120             | POLE (COMMERCIAL)       | UNSP. SLOPE ROCKFISH | FEDERAL                 | .9984796071                    | .9953533024                    | FEDERAL                 | 0                         | HIGH AGREEMENT   | T                      | 10/22/2021           |
| E             | C                  | C           | 2021 | 9/18/2021    | EUREKA    | 120             | POLE (COMMERCIAL)       | SABLEFISH            | FEDERAL                 | .9984796071                    | .9953533024                    | FEDERAL                 | 0                         | HIGH AGREEMENT   | T                      | 10/22/2021           |
| E             | C                  | C           | 2021 | 9/8/2021     | EUREKA    | 120             | POLE (COMMERCIAL)       | SABLEFISH            | FEDERAL                 | .9918970005                    | .9941834784                    | FEDERAL                 | 0                         | HIGH AGREEMENT   | T                      | 9/22/2021            |
| R             | C                  | C           | 2021 | 4/27/2021    | EUREKA    | 1041            | LONGLINE OR SETLINE     | SABLEFISH            | FEDERAL                 | .9965400913                    | .9949380543                    | FEDERAL                 | 0                         | HIGH AGREEMENT   | T                      | 8/3/2021             |
| R             | C                  | C           | 2018 | 4/4/2018     | EUREKA    | 1041            | LONGLINE OR SETLINE     | SABLEFISH            | FEDERAL                 | .9957874937                    | .994279007                     | FEDERAL                 | 0                         | HIGH AGREEMENT   | T                      | 8/3/2021             |

1 - 7
